# Supplementary material for: Emerging Perspectives on the Rare Tubulopathy Dent Disease: Is Glomerular Damage a Direct Consequence of ClC-5 Dysfunction?
Source: MDPI journal article supplement (doi:10.3390/ijms24021313), 2023-01-09
Supplement: s1 [file s1]

## Supplementary Figure

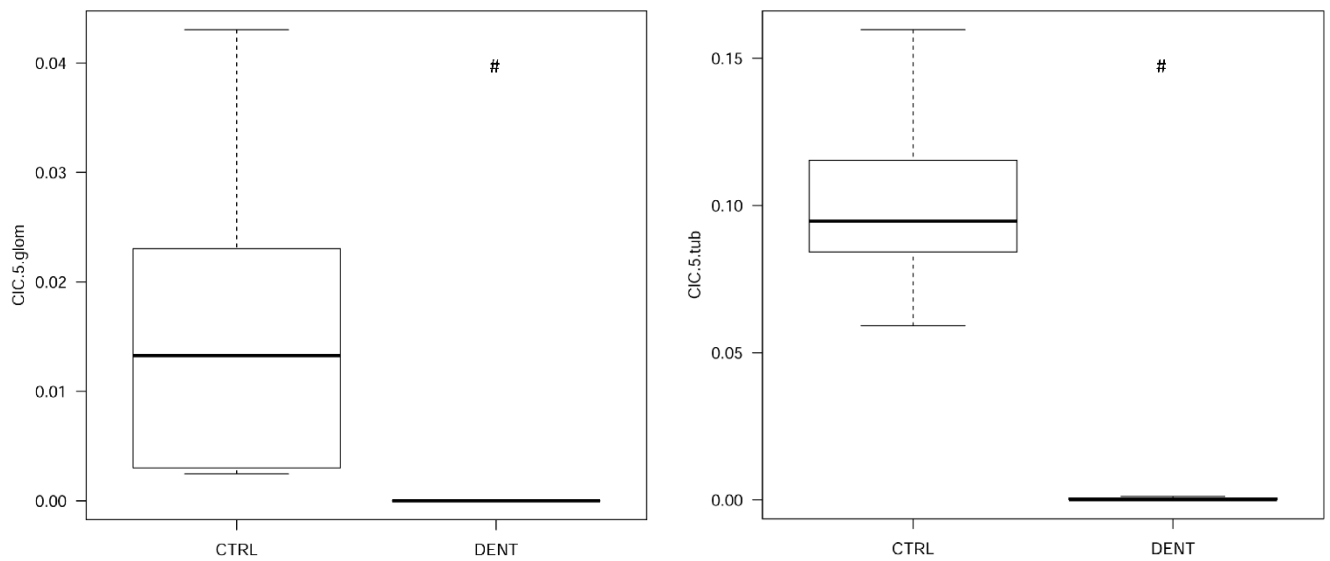

**Figure S1. Morphometric evaluation of CIC-5 in CTRL and DD1 biopsies in both tubular and glomerular compartments.** CIC-5 resulted down-regulated in DD1 vs CTRL (# $p < 0.01$ ) in both glomerular and tubular compartments. Boxplots show medians and interquartile ranges of IHC staining scores (% positive area).

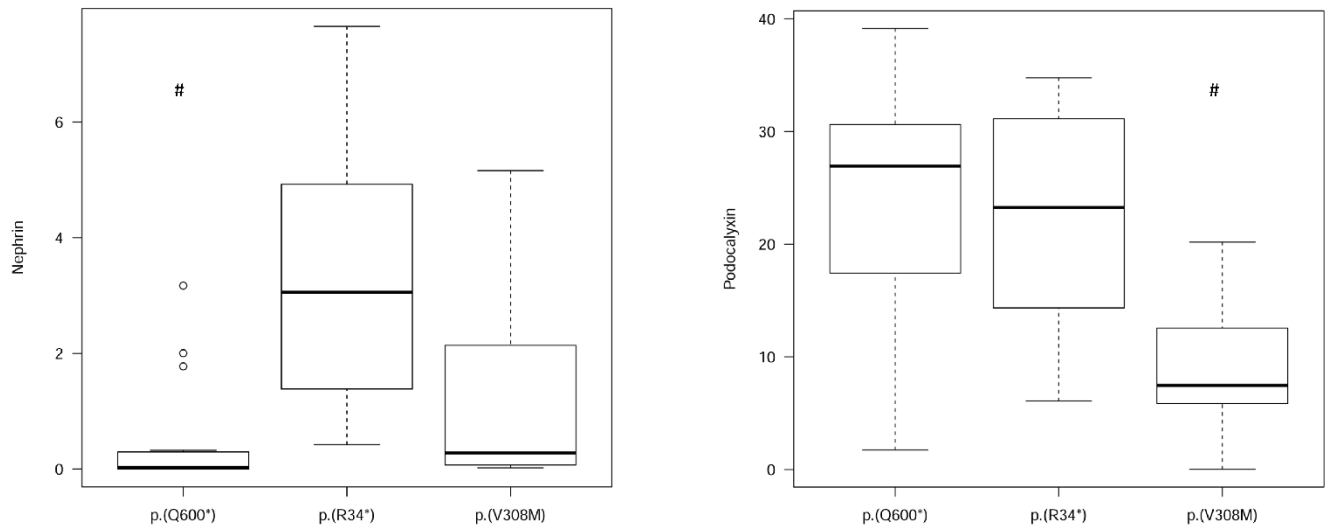

**Figure S2. Morphometric evaluation of nephrin and podocalyxin in DD1 biopsies from patients carrying different *CLCN5* mutations.** The patient carrying the p.(Q600\*) mutation shows the highest down-regulation of Nephrin (# $p < 0.01$ ). The patient carrying the p.(V308M) mutation shows the highest down-regulation of Podocalyxin (# $p < 0.01$ ). The lowest change in both markers was seen in the patient carrying the p.(R34\*) mutation. Boxplots show medians and interquartile ranges of IF staining scores (% positive area).

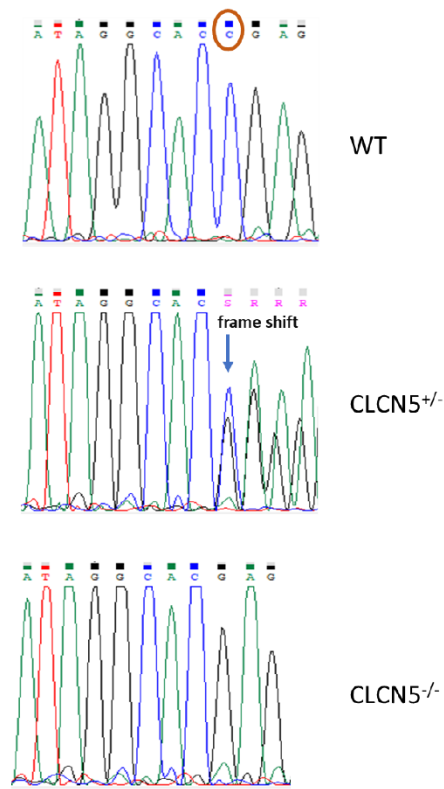

**Figure S3. *CLCN5* gene editing in podocyte cells by CRISPR-Cas9 technology.** Representative image of Sanger sequencing of PCR products of exon 2 from WT, *CLCN5*<sup>+/-</sup> and *CLCN5*<sup>-/-</sup> clones. The c.100delC mutation is shown.

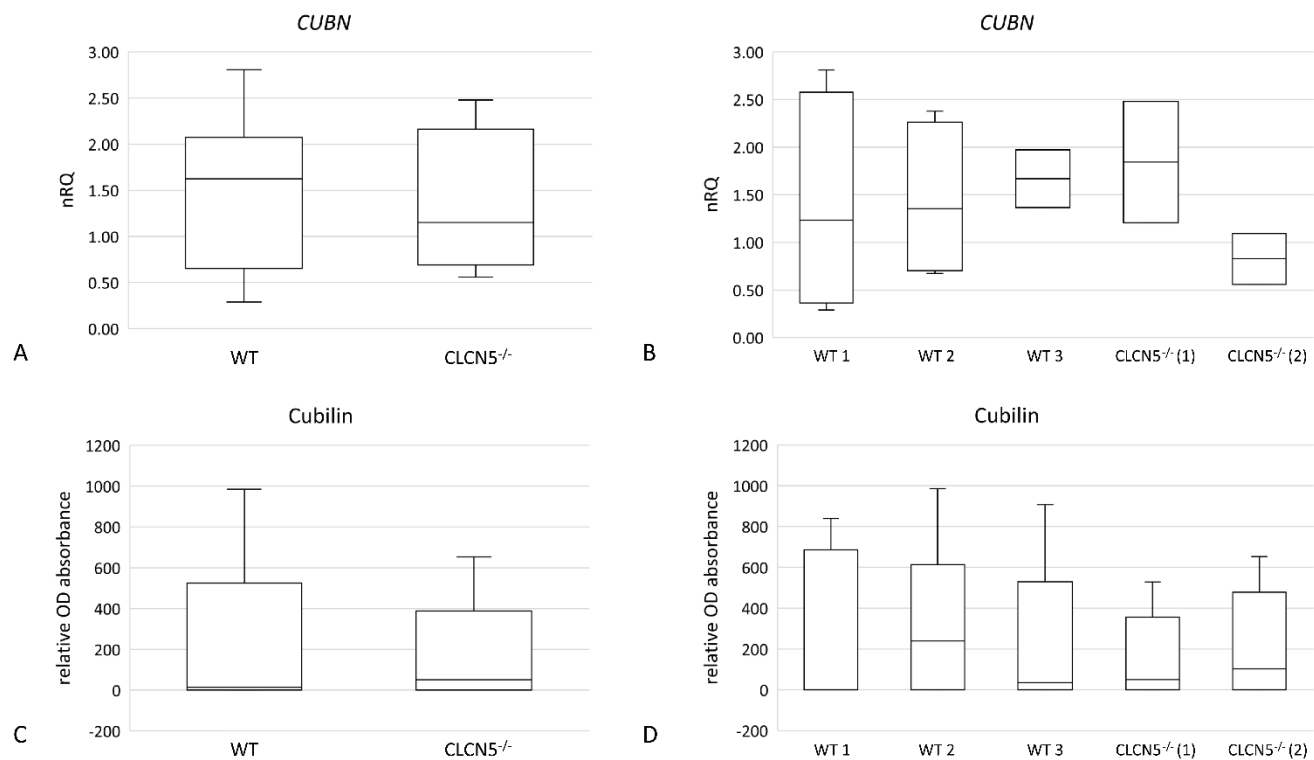

**Figure S4. Cubilin gene (*CUBN*) and protein expression in WT and *CLCN5*<sup>-/-</sup> clones.** Boxplots show medians and interquartile ranges of (A-B) relative mRNA, as determined by qRT-PCR, and (C-D) protein expression, as determined by ICW. p-values were obtained with the Mann-Whitney U test. Results are from two independent experiments performed in triplicate. Abbreviations: nRQ: normalized relative quantity; OD, optical density.
